# Supplementary material for: Clinical Breast Examination Uptake among Reproductive Aged Women in Zambia: Evidence from the 2024 Zambia Demographic and Health Survey
Source: Research Square preprint supplement (doi:10.21203/rs.3.rs-8380869/v1), 2026-01-08
Supplement: Supplementary file 1 [file 21ed6b149e39455925715628.docx]

# Supplementary Table 1: Predictor Variables and Coding

| Variable | DHS Code | Coding Used in Analysis |
| --- | --- | --- |
| Age Group | v012 | 1 = 15–19 years 2 = 20–29 years 3 = 30–39 years 4 = 40–49 years |
| Place of Residence | v025 | 1 = Urban 2 = Rural |
| Region/Province | v024 | 1 = Central 2 = Copperbelt 3 = Eastern 4 = Luapula  5= Lusaka  6= Muchinga  7= Northern  8= Northwestern  9= Southern  10= Western |
| Educational Level | v106 | 0 = No education 1 = Primary 2 = Secondary 3 = Higher |
| Wealth Status | v190 | 1 = Poorest 2 = Poorer 3 = Middle 4 = Richer 5 = Richest |
| Health Insurance Coverage | v481 | 0 = No 1 = Yes |
| Marital Status | v501 | 0 = Never in union 1 = Married/Living with partner 2 = Widowed/Divorced/Separated |
| Number of Children Ever Born (Parity) | v201 | 0 = 0 children 1 = 1 child  2 = 2-4 children 3 = ≥5 children |
| Self-Reported Health Status | v176 | 1 = Very Good/ Good (Represented as Good) 2 = Moderate 3 = Bad/ Very Bad (represented as Bad) |
| Ever Tested for HIV | v781 | 0 = No 1 = Yes |
| Visited Health Facility in Last 12 Months | v394 | 0 = No 1 = Yes |
| Distance to Health Facility | v467d | 1 = Big problem 2 = Not a big problem |
| Media Exposure | v157, v158, v159, v171b | 0 = Not at all 1 = Less than once a week 2 = At least once a week 3 = Almost every day |
| Employment Status | v714 | 0 = Not currently working 1 = Currently working |
| Age at First Sexual Intercourse (Sex Initiation) | v525 | 0 = Never had sex 1 = Early initiation (8–14 years) 2 = Normal initiation (15+ years) |
| HIV Test Result | v861 | 1 = Positive 2 = Negative 3 = Indeterminate/No result/Declined |
| Age at Menarche | v249 | 1 = Don’t know / Never menstruated 2 = Early (<12 years)  3 = Normal (12–16 years)  4 = Delayed (>16 years) |
| Ever tested for cervical cancer by health care provider | V484b | 0 = No 1 = Yes |
